# Supplementary material for: Perspectives on the Role of Enzymatic Biocatalysis for the Degradation of Plastic PET
Source: MDPI journal article supplement (doi:10.3390/ijms222011257), 2021-10-19
Supplement: s1 [file s1]

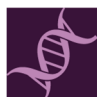

*Supplementary Information*

# Perspectives on the role of Enzymatic Biocatalysis for the Degradation of Plastic PET

Rita P. Magalhães <sup>1,2</sup>, Jorge M. Cunha <sup>1,2</sup> and Sérgio F. Sousa <sup>1,2,\*</sup>

<sup>1</sup> UCIBIO – Applied Molecular Biosciences Unit, BioSIM – Departamento de Biomedicina, Faculdade de Medicina da Universidade do Porto;

<sup>2</sup> Associate Laboratory i4HB – Institute for Health and Bioeconomy, Faculdade de Medicina, Universidade do Porto, Portugal;

\* Correspondence: sergiofsousa@med.up.pt

**Table S1:** Mutagenesis assays with *Is*PETase

| Mutation | Rationale                                       | Assay Results                     | Substrate | Assay Conditions      | REF |
|----------|-------------------------------------------------|-----------------------------------|-----------|-----------------------|-----|
| C203S    | DS1 disrupting mutation                         | Very low activity                 | PET Film  | pH=9.0 T=30 °C t=42 h | [1] |
| C239S    | DS1 disrupting mutation                         | Very low activity                 | PET Film  | pH=9.0 T=30 °C t=42 h | [1] |
| W185A    | Confirm residue role in catalysis/activity      | Very low activity                 | PET Film  | pH=9.0 T=30 °C t=42 h | [1] |
| S214H    | Confirm residue role in catalysis/activity      | Diminished activity               | PET Film  | pH=9.0 T=30 °C t=42 h | [1] |
| I208A    | Substrate Interacting Residue                   | Diminished activity               | PET Film  | pH=9.0 T=30 °C t=42 h | [1] |
| W159A    | Substrate Interacting Residue                   | Diminished activity               | PET Film  | pH=9.0 T=30 °C t=42 h | [1] |
| M161A    | Substrate Interacting Residue                   | Diminished activity               | PET Film  | pH=9.0 T=30 °C t=42 h | [1] |
| Y87A     | Substrate Interacting Residue                   | Diminished activity               | PET Film  | pH=9.0 T=30 °C t=42 h | [1] |
| T88A     | Substrate Interacting Residue                   | Diminished activity               | PET Film  | pH=9.0 T=30 °C t=42 h | [1] |
| W168H    | Consistent Histidine residue in similar enzymes | Significantly diminished activity | PET Film  | pH=9.0 T=30 °C t=42 h | [1] |
| S160A    | Confirm role as catalytic triad residue         | Complete loss of activity         | BHET      | pH=7.0 T=30 °C        | [2] |
| D206A    | Confirm role as catalytic triad residue         | Complete loss of activity         | BHET      | pH=7.0 T=30 °C        | [2] |
| H237A    | Confirm role as catalytic triad residue         | Complete loss of activity         | BHET      | pH=7.0 T=30 °C        | [2] |
| S160A    | Confirm role as catalytic triad residue         | Complete loss of activity         | PET Film  | pH=9.0 T=30 °C        | [2] |
| D206A    | Confirm role as catalytic triad residue         | Complete loss of activity         | PET Film  | pH=9.0 T=30 °C        | [2] |
| H237A    | Confirm role as catalytic triad residue         | Complete loss of activity         | PET Film  | pH=9.0 T=30 °C        | [2] |
| Y87A     | Subsite I residue / Oxanion Hole                | 5% of WT hydrolytic activity      | BHET      | pH=7.0 T=30 °C        | [2] |
| Y87A     | Subsite I residue / Oxanion Hole                | Diminished activity               | PET Film  | pH=9.0 T=30 °C        | [2] |
| M161A    | Subsite I residue / Oxanion Hole                | 52% of WT hydrolytic activity     | BHET      | pH=7.0 T=30 °C        | [2] |
| M161A    | Subsite I residue / Oxanion Hole                | Diminished activity               | PET Film  | pH=9.0 T=30 °C        | [2] |
| W185A    | Subsite I residue                               | 5% of WT hydrolytic activity      | BHET      | pH=7.0 T=30 °C        | [2] |
| W185A    | Subsite I residue                               | Diminished activity               | PET Film  | pH=9.0 T=30 °C        | [2] |
| I208A    | Subsite I residue                               | 46% of WT hydrolytic activity     | BHET      | pH=7.0 T=30 °C        | [2] |
| I208A    | Subsite I residue                               | Diminished activity               | PET Film  | pH=9.0 T=30 °C        | [2] |
| W159A    | Subsite II residue                              | 8% of WT hydrolytic activity      | BHET      | pH=7.0 T=30 °C        | [2] |
| W159A    | Subsite II residue                              | Diminished activity               | PET Film  | pH=9.0 T=30 °C        | [2] |
| S238A    | Subsite II residue                              | Activity similar to WT            | BHET      | pH=7.0 T=30 °C        | [2] |
| S238A    | Subsite II residue                              | Diminished activity               | PET Film  | pH=9.0 T=30 °C        | [2] |
| N241A    | Subsite II residue                              | 18% of WT hydrolytic activity     | BHET      | pH=7.0 T=30 °C        | [2] |

|             |                                         |                                                                     |            |                |     |
|-------------|-----------------------------------------|---------------------------------------------------------------------|------------|----------------|-----|
| N241A       | Subsite II residue                      | Diminished activity                                                 | PET Film   | pH=9.0 T=30 °C | [2] |
| R280A       | Subsite II residue                      | Activity similar to WT                                              | BHET       | pH=7.0 T=30 °C | [2] |
| R280A       | Subsite II residue                      | 22.4% increased activity in 18h and 32.4% increased activity in 36h | PET Film   | pH=9.0 T=30 °C | [2] |
| C203S       | DS1 disrupting mutation                 | Very low activity                                                   | BHET       | pH=7.0 T=30 °C | [2] |
| C239S       | DS1 disrupting mutation                 | Very low activity                                                   | BHET       | pH=7.0 T=30 °C | [2] |
| C203S       | DS1 disrupting mutation                 | Very low activity                                                   | PET Film   | pH=9.0 T=30 °C | [2] |
| C239S       | DS1 disrupting mutation                 | Very low activity                                                   | PET Film   | pH=9.0 T=30 °C | [2] |
| S238F       | Introduce residue present in TfCut2     | Significantly diminished activity                                   | BHET       | pH=7.0 T=30 °C | [2] |
| W159H       | Introduce residue present in TfCut2     | Significantly diminished activity                                   | BHET       | pH=7.0 T=30 °C | [2] |
| S238F       | Introduce residue present in TfCut2     | Significantly diminished activity                                   | PET Film   | pH=9.0 T=30 °C | [2] |
| W159H       | Introduce residue present in TfCut2     | Significantly diminished activity                                   | PET Film   | pH=9.0 T=30 °C | [2] |
| S238F/W159H | Introduce residues present in TfCut2    | Outperformed WT in crystallinity reduction and product release      | PET Film   | pH=7.2         | [3] |
| W185A       | Subsite I residue                       | Significantly diminished activity                                   | PET Film   | pH=7.2         | [3] |
| S160A       | Confirm role as catalytic triad residue | Complete loss of activity                                           | BHET       | pH=7.5 T=30 °C | [4] |
| S160A       | Confirm role as catalytic triad residue | Complete loss of activity                                           | PET bottle | pH=9.0 T=30 °C | [4] |
| D206A       | Confirm role as catalytic triad residue | Complete loss of activity                                           | BHET       | pH=7.5 T=30 °C | [4] |
| D206A       | Confirm role as catalytic triad residue | Complete loss of activity                                           | PET bottle | pH=9.0 T=30 °C | [4] |
| H237A       | Confirm role as catalytic triad residue | Complete loss of activity                                           | BHET       | pH=7.5 T=30 °C | [4] |
| H237A       | Confirm role as catalytic triad residue | Complete loss of activity                                           | PET bottle | pH=9.0 T=30 °C | [4] |
| W159A       | Substrate Interacting Residue           | Increased Activity                                                  | BHET       | pH=7.5 T=30 °C | [4] |
| W159A       | Substrate Interacting Residue           | Increased Activity                                                  | PET bottle | pH=9.0 T=30 °C | [4] |
| W159H       | Substrate Interacting Residue           | Increased Activity                                                  | BHET       | pH=7.5 T=30 °C | [4] |
| W159H       | Substrate Interacting Residue           | Increased Activity                                                  | PET bottle | pH=9.0 T=30 °C | [4] |
| M161A       | Substrate Interacting Residue           | Diminished activity                                                 | BHET       | pH=7.5 T=30 °C | [4] |
| M161A       | Substrate Interacting Residue           | Diminished activity                                                 | PET bottle | pH=9.0 T=30 °C | [4] |
| W185A       | Substrate Interacting Residue           | Diminished activity                                                 | BHET       | pH=7.5 T=30 °C | [4] |
| W185A       | Substrate Interacting Residue           | Diminished activity                                                 | PET bottle | pH=9.0 T=30 °C | [4] |
| A209I       | Substrate Interacting Residue           | Increased Activity                                                  | BHET       | pH=7.5 T=30 °C | [4] |
| A209I       | Substrate Interacting Residue           | Increased Activity                                                  | PET bottle | pH=9.0 T=30 °C | [4] |
| Q119A       | Substrate Interacting Residue           | Diminished activity                                                 | BHET       | pH=7.5 T=30 °C | [4] |

|             |                                                                      |                                                                                              |                     |                 |     |
|-------------|----------------------------------------------------------------------|----------------------------------------------------------------------------------------------|---------------------|-----------------|-----|
| Q119A       | Substrate Interacting Residue                                        | Diminished activity                                                                          | PET bottle          | pH=9.0 T=30 °C  | [4] |
| S214H       | Substrate Interacting Residue                                        | Increased Activity                                                                           | BHET                | pH=7.5 T=30 °C  | [4] |
| S214H       | Substrate Interacting Residue                                        | Increased Activity                                                                           | PET bottle          | pH=9.0 T=30 °C  | [4] |
| S238F       | Substrate Interacting Residue                                        | Activity similar to WT                                                                       | BHET                | pH=7.5 T=30 °C  | [4] |
| S238F       | Substrate Interacting Residue                                        | Significantly diminished activity                                                            | PET bottle          | pH=9.0 T=30 °C  | [4] |
| Y87A        | Substrate Interacting Residue                                        | Increased Activity                                                                           | BHET                | pH=7.5 T=30 °C  | [4] |
| Y87A        | Substrate Interacting Residue                                        | Increased Activity                                                                           | PET bottle          | pH=9.0 T=30 °C  | [4] |
| W97L        | Active Site Residue (stabilizes rigidity)                            | Significantly diminished activity                                                            | BHET                | pH=7.5 T=30 °C  | [4] |
| W97L        | Active Site Residue (stabilizes rigidity)                            | Significantly diminished activity                                                            | PET bottle          | pH=9.0 T=30 °C  | [4] |
| Q182L       | Active Site Residue (stabilizes rigidity)                            | Significantly diminished activity                                                            | BHET                | pH=7.5 T=30 °C  | [4] |
| Q182L       | Active Site Residue (stabilizes rigidity)                            | Significantly diminished activity                                                            | PET bottle          | pH=9.0 T=30 °C  | [4] |
| R123A       | Active Site Residue (stabilizes rigidity)                            | Significantly diminished activity                                                            | BHET                | pH=7.5 T=30 °C  | [4] |
| R123A       | Active Site Residue (stabilizes rigidity)                            | Significantly diminished activity                                                            | PET bottle          | pH=9.0 T=30 °C  | [4] |
| N241A       | Active Site Residue (stabilizes rigidity)                            | Significantly diminished activity                                                            | BHET                | pH=7.5 T=30 °C  | [4] |
| N241A       | Active Site Residue (stabilizes rigidity)                            | Significantly diminished activity                                                            | PET bottle          | pH=9.0 T=30 °C  | [4] |
| S93F        | Reduce substrate specificity - attain degradation of naphthyl esters | Increased Activity agains 1-NP                                                               | 1-Naphthyl butyrate | -               | [5] |
| W159F       | Reduce substrate specificity - attain degradation of naphthyl esters | Increased Activity agains 1-NP                                                               | 1-Naphthyl butyrate | -               | [5] |
| N242F       | Reduce substrate specificity - attain degradation of naphthyl esters | Increased Activity agains 1-NP                                                               | 1-Naphthyl butyrate | -               | [5] |
| P181A       | Residue disrupting secondary structure                               | T <sub>m</sub> =49.25 °C / Diminished activity                                               | PET film            | 30 °C and 40 °C | [6] |
| S121D/D186H | Introduce residue present in TfCut2                                  | T <sub>m</sub> =54.85 °C / Increased Activity by 2 fold after 24 h and 72 h                  | PET film            | 30 °C           | [6] |
| S121D/D186H | Introduce residue present in TfCut2                                  | T <sub>m</sub> =54.85 °C / Increased Activity by 3.4 fold after 24 h and 4.4 fold at 72 h    | PET film            | 40 °C           | [6] |
| S121E/D186H | Improve previously discovered variant                                | T <sub>m</sub> =56.02 °C / Increased Activity by 2.9 fold after 24 h and 2.6 fold after 72 h | PET film            | 30 °C           | [6] |
| S121E/D186H | Improve previously discovered variant                                | T <sub>m</sub> =54.85 °C / Increased Activity by 4.5 fold after 24 h and 6.0fold at 72 h     | PET film            | 40 °C           | [6] |
| S121D       | Improve previously discovered variant                                | Slight activity increase at 30 °C but lower at 40 °C                                         | PET film            | 30 °C and 40 °C | [6] |
| S121E       | Improve previously discovered variant                                | Slight activity increase at 30 °C but lower at 40 °C                                         | PET film            | 30 °C and 40 °C | [6] |
| D186H       | Improve previously discovered variant                                | Slight activity increase                                                                     | PET film            | 30 °C and 40 °C | [6] |
| D186F       | Improve previously discovered variant                                | Slight activity increase                                                                     | PET film            | 30 °C and 40 °C | [6] |

|                                                                      |                                                                                      |                                                                                          |            |                         |     |
|----------------------------------------------------------------------|--------------------------------------------------------------------------------------|------------------------------------------------------------------------------------------|------------|-------------------------|-----|
| P181G                                                                | Residue disrupting secondary structure                                               | Diminished activity                                                                      | PET film   | 30 °C and 40 °C         | [6] |
| P181S                                                                | Residue disrupting secondary structure                                               | Diminished activity                                                                      | PET film   | 30 °C and 40 °C         | [6] |
| P181A/S121D/D186H                                                    | Improve previously discovered variant                                                | T <sub>m</sub> =52.69 °C / Increased Activity by 2 fold after 24 h and 1.6 after 72 h    | PET film   | 30 °C                   | [6] |
| P181A/S121D/D186H                                                    | Improve previously discovered variant                                                | T <sub>m</sub> =52.69 °C / Increased Activity by 2.3 fold after 24 h and 2.9 after 72 h  | PET film   | 40 °C                   | [6] |
| P181A/S121E/D186H                                                    | Improve previously discovered variant                                                | T <sub>m</sub> =53.56 °C / Increased Activity by 1.6 fold after 24 h and 1.2 after 72 h  | PET film   | 30 °C                   | [6] |
| P181A/S121E/D186H                                                    | Improve previously discovered variant                                                | T <sub>m</sub> =53.56 °C / Increased Activity by 1.6 fold after 24 h and 2.3 after 72 h  | PET film   | 40 °C                   | [6] |
| S121D/D186H/R280A                                                    | Improve previously discovered variant                                                | T <sub>m</sub> =56.41 °C / Increased Activity by 3.4 fold after 24 h and 5.0 after 72 h  | PET film   | 30 °C                   | [6] |
| S121D/D186H/R280A                                                    | Improve previously discovered variant                                                | T <sub>m</sub> =56.41 °C / Increased Activity by 8.1 fold after 24 h and 10.8 after 72 h | PET film   | 40 °C                   | [6] |
| S121E/D186H/R280A                                                    | Improve previously discovered variant                                                | T <sub>m</sub> =57.62 °C / Increased Activity by 4.3 fold after 24 h and 5.2 after 72 h  | PET film   | 30 °C                   | [6] |
| S121E/D186H/R280A                                                    | Improve previously discovered variant                                                | T <sub>m</sub> =57.62 °C / Increased Activity by 9.1 fold after 24 h and 13.9 after 72 h | PET film   | 40 °C                   | [6] |
| S214H, I168R, W159H, S188Q, R280A, A180I, G165A, Q119Y, L117F, T140D | Consensus mutations predicted through GRAPE strategy                                 | Increased activity by over 300 fold                                                      | PET Film   | 37 °C 10 days           | [7] |
| Y87F                                                                 | Substrate interacting residue replaced by residue present in other PETase candidates | Slightly diminished activity                                                             | PET bottle | pH=90 T=25 °C and 37 °C | [8] |
| T88L                                                                 | Substrate interacting residue replaced by residue present in other PETase candidates | Highly diminished activity                                                               | PET bottle | pH=90 T=25 °C and 37 °C | [8] |
| R90S                                                                 | Substrate interacting residue replaced by residue present in other PETase candidates | Highly diminished activity                                                               | PET bottle | pH=90 T=25 °C and 37 °C | [8] |
| I208V                                                                | Substrate interacting residue replaced by residue present in other PETase candidates | Slightly diminished activity                                                             | PET bottle | pH=90 T=25 °C and 37 °C | [8] |
| I208T                                                                | Substrate interacting residue replaced by residue present in other PETase candidates | Highly diminished activity                                                               | PET bottle | pH=90 T=25 °C and 37 °C | [8] |
| G234N                                                                | Substrate interacting residue replaced by residue present in other PETase candidates | Highly diminished activity                                                               | PET bottle | pH=90 T=25 °C and 37 °C | [8] |
| S238T                                                                | Substrate interacting residue replaced by residue present in other PETase candidates | Slightly diminished activity                                                             | PET bottle | pH=90 T=25 °C and 37 °C | [8] |
| S242T                                                                | Substrate interacting residue replaced by residue present in other PETase candidates | Significantly increased activity                                                         | PET bottle | pH=90 T=25 °C and 37 °C | [8] |
| N246D                                                                | Substrate interacting residue replaced by residue present in other PETase candidates | Significantly increased activity                                                         | PET bottle | pH=90 T=25 °C and 37 °C | [8] |
| S121E/D186H/N246D/R280A                                              | Inserting N246D mutation into previously discovered                                  | Increased activity compared to WT but lower than S121E/D186/R280A mutation               | PET bottle | pH=90 T=25 °C and 37 °C | [8] |

|                              |                                                                                             |                                                                     |            |                         |     |
|------------------------------|---------------------------------------------------------------------------------------------|---------------------------------------------------------------------|------------|-------------------------|-----|
| high activity mutated enzyme |                                                                                             |                                                                     |            |                         |     |
| S121E/D186H/S242T/N246D      | Inserting N246D and S242T mutations into previously discovered high activity mutated enzyme | Increased activity by 58 fold at 37 °C compared to WT               | PET bottle | pH=90 T=25 °C and 37 °C | [8] |
| R61A                         | Substrate Interacting Residue                                                               | 1.6 times greater product release compared to WT in same conditions | PET Film   | pH=8.5 30 °C 48h        | [9] |
| L88F                         | Substrate Interacting Residue                                                               | 2.1 times greater product release compared to WT in same conditions | PET Film   | pH=8.5 30 °C 48h        | [9] |
| S178T                        | Substrate Interacting Residue                                                               | Diminished activity                                                 | PET Film   | pH=8.5 30 °C 48h        | [9] |
| I179F                        | Substrate Interacting Residue                                                               | 2.5 times greater product release compared to WT in same conditions | PET Film   | pH=8.5 30 °C 48h        | [9] |
| I179V                        | Substrate Interacting Residue                                                               | Similar activity to WT                                              | PET Film   | pH=8.5 30 °C 48h        | [9] |
| S209V                        | Substrate Interacting Residue                                                               | Diminished activity                                                 | PET Film   | pH=8.5 30 °C 48h        | [9] |
| S209F                        | Substrate Interacting Residue                                                               | Similar activity to WT                                              | PET Film   | pH=8.5 30 °C 48h        | [9] |
| A211P                        | Substrate Interacting Residue                                                               | Similar activity to WT                                              | PET Film   | pH=8.5 30 °C 48h        | [9] |

**Table S2:** Mutagenesis assays with *IsMHETase*

| Mutations   | Rationale                                      | Assay result                     | Substrate | Assay condition | REF  |
|-------------|------------------------------------------------|----------------------------------|-----------|-----------------|------|
| R411K       | Active Site Residue                            | Significantly decreases activity | MHET      | pH=7.5 T=30°C   | [10] |
| R411K       | Active Site Residue                            | Significantly increases activity | BHET      | pH=7.5 T=30°C   | [10] |
| F415S       | Active Site Residue                            | Significantly decreases activity | MHET      | pH=7.5 T=30°C   | [10] |
| F424D       | Substrate Binding Hinderer                     | Very low activity                | MHET      | pH=7.5 T=30°C   | [10] |
| F424D       | Substrate Binding Hinderer                     | Small increase in activity       | BHET      | pH=7.5 T=30°C   | [10] |
| F424E       | Substrate Binding Hinderer                     | Very low activity                | MHET      | pH=7.5 T=30°C   | [10] |
| F424E       | Substrate Binding Hinderer                     | Small increase in activity       | BHET      | pH=7.5 T=30°C   | [10] |
| F424H       | Substrate Binding Hinderer                     | Very low activity                | MHET      | pH=7.5 T=30°C   | [10] |
| F424H       | Substrate Binding Hinderer                     | Small increase in activity       | BHET      | pH=7.5 T=30°C   | [10] |
| F424I       | Substrate Binding Hinderer                     | Significantly decreases activity | MHET      | pH=7.5 T=30°C   | [10] |
| F424I       | Substrate Binding Hinderer                     | Significantly increases activity | BHET      | pH=7.5 T=30°C   | [10] |
| F424L       | Substrate Binding Hinderer                     | Very low activity                | MHET      | pH=7.5 T=30°C   | [10] |
| F424L       | Substrate Binding Hinderer                     | Small increase in activity       | BHET      | pH=7.5 T=30°C   | [10] |
| F424N       | Substrate Binding Hinderer                     | Significantly decreases activity | MHET      | pH=7.5 T=30°C   | [10] |
| F424N       | Substrate Binding Hinderer                     | Significantly increases activity | BHET      | pH=7.5 T=30°C   | [10] |
| F424T       | Substrate Binding Hinderer                     | Very low activity                | MHET      | pH=7.5 T=30°C   | [10] |
| F424T       | Substrate Binding Hinderer                     | Small increase in activity       | BHET      | pH=7.5 T=30°C   | [10] |
| F424V       | Substrate Binding Hinderer                     | Significantly decreases activity | MHET      | pH=7.5 T=30°C   | [10] |
| F424V       | Substrate Binding Hinderer                     | Significantly increases activity | BHET      | pH=7.5 T=30°C   | [10] |
| R411K/F424N | Double-mutant of previously described variants | Significantly decreases activity | MHET      | pH=7.5 T=30°C   | [10] |

|                   |                                                |                                  |       |               |      |
|-------------------|------------------------------------------------|----------------------------------|-------|---------------|------|
| R411K/F424N       | Double-mutant of previously described variants | Significantly increases activity | BHET  | pH=7.5 T=30°C | [10] |
| R411K/F424V       | Double-mutant of previously described variants | Significantly decreases activity | MHET  | pH=7.5 T=30°C | [10] |
| R411K/F424V       | Double-mutant of previously described variants | Significantly increases activity | BHET  | pH=7.5 T=30°C | [10] |
| R411K/F424I       | Double-mutant of previously described variants | Significantly decreases activity | MHET  | pH=7.5 T=30°C | [10] |
| R411K/F424I       | Double-mutant of previously described variants | Significantly increases activity | BHET  | pH=7.5 T=30°C | [10] |
| F415H/F424N       | Double-mutant of previously described variants | Significantly decreases activity | MHET  | pH=7.5 T=30°C | [10] |
| F415H/F424N       | Double-mutant of previously described variants | Significantly increases activity | BHET  | pH=7.5 T=30°C | [10] |
| R411K/S416A/F424N | Triple-mutant of previously described variants | Significantly decreases activity | MHET  | pH=7.5 T=30°C | [10] |
| R411K/S416A/F424N | Triple-mutant of previously described variants | Significantly increases activity | BHET  | pH=7.5 T=30°C | [10] |
| S225A             | Confirm role as catalytic triad residue        | Complete loss of activity        | MHET  | pH=7.5 T=30°C | [11] |
| S225A             | Confirm role as catalytic triad residue        | Complete loss of activity        | MpNPT | pH=7.5 T=30°C | [11] |
| S225A             | Confirm role as catalytic triad residue        | Complete loss of activity        | BHET  | pH=7.5 T=30°C | [11] |
| D492A             | Confirm role as catalytic triad residue        | Complete loss of activity        | MHET  | pH=7.5 T=30°C | [11] |
| D492A             | Confirm role as catalytic triad residue        | Complete loss of activity        | MpNPT | pH=7.5 T=30°C | [11] |
| H528A             | Confirm role as catalytic triad residue        | Complete loss of activity        | MHET  | pH=7.5 T=30°C | [11] |
| H528A             | Confirm role as catalytic triad residue        | Complete loss of activity        | MpNPT | pH=7.5 T=30°C | [11] |
| W397A             | Active Site Residue                            | Significantly increases activity | MHET  | pH=7.5 T=30°C | [11] |
| W397A             | Active Site Residue                            | Small increase in activity       | MpNPT | pH=7.5 T=30°C | [11] |
| R411A             | Active Site Residue                            | Very low activity                | MHET  | pH=7.5 T=30°C | [11] |
| R411A             | Active Site Residue                            | Slightly lower activity          | MpNPT | pH=7.5 T=30°C | [11] |
| R411A             | Active Site Residue                            | Small increase in activity       | BHET  | pH=7.5 T=30°C | [11] |

|       |                               |                                  |       |               |      |
|-------|-------------------------------|----------------------------------|-------|---------------|------|
| R411Q | Active Site Residue           | Very low activity                | MHET  | pH=7.5 T=30°C | [11] |
| R411Q | Active Site Residue           | Significantly decreases activity | MpNPT | pH=7.5 T=30°C | [11] |
| R411Q | Active Site Residue           | Small increase in activity       | BHET  | pH=7.5 T=30°C | [11] |
| F415A | Active Site Residue           | Slightly lower activity          | MHET  | pH=7.5 T=30°C | [11] |
| F415A | Active Site Residue           | Significantly decreases activity | MpNPT | pH=7.5 T=30°C | [11] |
| F415H | Active Site Residue           | Significantly increases activity | MHET  | pH=7.5 T=30°C | [11] |
| F415H | Active Site Residue           | No difference                    | MpNPT | pH=7.5 T=30°C | [11] |
| S416A | Substrate Interacting Residue | Significantly increases activity | MHET  | pH=7.5 T=30°C | [11] |
| S416A | Substrate Interacting Residue | Slightly lower activity          | MpNPT | pH=7.5 T=30°C | [11] |
| S416A | Substrate Interacting Residue | Significantly increases activity | BHET  | pH=7.5 T=30°C | [11] |
| S416G | Substrate Interacting Residue | Slightly lower activity          | MHET  | pH=7.5 T=30°C | [11] |
| S416G | Substrate Interacting Residue | No difference                    | MpNPT | pH=7.5 T=30°C | [11] |
| S416G | Substrate Interacting Residue | No difference                    | BHET  | pH=7.5 T=30°C | [11] |
| S419G | Substrate Interacting Residue | Slightly lower activity          | MHET  | pH=7.5 T=30°C | [11] |
| S419G | Substrate Interacting Residue | Significantly increases activity | MpNPT | pH=7.5 T=30°C | [11] |
| S419G | Substrate Interacting Residue | Significantly increases activity | BHET  | pH=7.5 T=30°C | [11] |
| F424A | Substrate Binding Hinderer    | Significantly increases activity | BHET  | pH=7.5 T=30°C | [11] |
| F424N | Substrate Binding Hinderer    | Significantly decreases activity | MHET  | pH=7.5 T=30°C | [11] |
| F424N | Substrate Binding Hinderer    | Significantly decreases activity | MpNPT | pH=7.5 T=30°C | [11] |
| F424N | Substrate Binding Hinderer    | Significantly increases activity | BHET  | pH=7.5 T=30°C | [11] |
| F424Q | Substrate Binding Hinderer    | Significantly decreases activity | MHET  | pH=7.5 T=30°C | [11] |

|             |                                                |                                  |       |               |      |
|-------------|------------------------------------------------|----------------------------------|-------|---------------|------|
| F424Q       | Substrate Binding Hinderer                     | Significantly decreases activity | MpNPT | pH=7.5 T=30°C | [11] |
| F424Q       | Substrate Binding Hinderer                     | Significantly increases activity | BHET  | pH=7.5 T=30°C | [11] |
| F424S       | Substrate Binding Hinderer                     | Significantly increases activity | BHET  | pH=7.5 T=30°C | [11] |
| H488A       | Substrate Interacting Residue                  | No difference                    | MHET  | pH=7.5 T=30°C | [11] |
| H488A       | Substrate Interacting Residue                  | No difference                    | MpNPT | pH=7.5 T=30°C | [11] |
| H488A       | Active Site Residue                            | Significantly decreases activity | MHET  | pH=7.5 T=30°C | [11] |
| H488A       | Active Site Residue                            | Significantly decreases activity | MpNPT | pH=7.5 T=30°C | [11] |
| L254N/F424N | Double-mutant of previously described variants | Significantly decreases activity | MpNPT | pH=7.5 T=30°C | [11] |
| L254N/F424N | Double-mutant of previously described variants | Small increase in activity       | BHET  | pH=7.5 T=30°C | [11] |
| R411A/S416A | Double-mutant of previously described variants | Inactive                         | MHET  | pH=7.5 T=30°C | [11] |
| R411A/S416A | Double-mutant of previously described variants | Significantly decreases activity | MpNPT | pH=7.5 T=30°C | [11] |
| R411A/S416A | Double-mutant of previously described variants | Significantly increases activity | BHET  | pH=7.5 T=30°C | [11] |
| R411A/S416G | Double-mutant of previously described variants | Inactive                         | MHET  | pH=7.5 T=30°C | [11] |
| R411A/S416G | Double-mutant of previously described variants | Significantly decreases activity | MpNPT | pH=7.5 T=30°C | [11] |
| R411A/S416G | Double-mutant of previously described variants | Significantly increases activity | BHET  | pH=7.5 T=30°C | [11] |
| R411A/S419G | Double-mutant of previously described variants | Inactive                         | MHET  | pH=7.5 T=30°C | [11] |
| R411A/S419G | Double-mutant of previously described variants | Significantly decreases activity | MpNPT | pH=7.5 T=30°C | [11] |
| R411A/S419G | Double-mutant of previously described variants | Significantly increases activity | BHET  | pH=7.5 T=30°C | [11] |
| R411Q/S416A | Double-mutant of previously described variants | Inactive                         | MHET  | pH=7.5 T=30°C | [11] |
| R411Q/S416A | Double-mutant of previously described variants | Significantly decreases activity | MpNPT | pH=7.5 T=30°C | [11] |
| R411Q/S416A | Double-mutant of previously described variants | Significantly increases activity | BHET  | pH=7.5 T=30°C | [11] |

|                   |                                                |                                  |       |               |      |
|-------------------|------------------------------------------------|----------------------------------|-------|---------------|------|
| R411Q/S416G       | Double-mutant of previously described variants | Inactive                         | MHET  | pH=7.5 T=30°C | [11] |
| R411Q/S416G       | Double-mutant of previously described variants | Significantly decreases activity | MpNPT | pH=7.5 T=30°C | [11] |
| R411Q/S416G       | Double-mutant of previously described variants | Significantly increases activity | BHET  | pH=7.5 T=30°C | [11] |
| R411A/S419G       | Double-mutant of previously described variants | Inactive                         | MHET  | pH=7.5 T=30°C | [11] |
| R411A/S419G       | Double-mutant of previously described variants | Significantly increases activity | MpNPT | pH=7.5 T=30°C | [11] |
| R411A/S419G       | Double-mutant of previously described variants | Significantly increases activity | BHET  | pH=7.5 T=30°C | [11] |
| F415H/F424N       | Double-mutant of previously described variants | Significantly decreases activity | MpNPT | pH=7.5 T=30°C | [11] |
| F415H/F424N       | Double-mutant of previously described variants | Small increase in activity       | BHET  | pH=7.5 T=30°C | [11] |
| F415H/F424N       | Double-mutant of previously described variants | Significantly decreases activity | MpNPT | pH=7.5 T=30°C | [11] |
| F415H/F424N       | Double-mutant of previously described variants | Significantly increases activity | BHET  | pH=7.5 T=30°C | [11] |
| S416A/S419G       | Double-mutant of previously described variants | Significantly decreases activity | MpNPT | pH=7.5 T=30°C | [11] |
| S416A/S419G       | Double-mutant of previously described variants | Significantly increases activity | BHET  | pH=7.5 T=30°C | [11] |
| S419G/F424N       | Double-mutant of previously described variants | Significantly decreases activity | MpNPT | pH=7.5 T=30°C | [11] |
| S419G/F424N       | Double-mutant of previously described variants | Significantly increases activity | BHET  | pH=7.5 T=30°C | [11] |
| F424N/H467N       | Double-mutant of previously described variants | Slightly lower activity          | MpNPT | pH=7.5 T=30°C | [11] |
| F424N/H467N       | Double-mutant of previously described variants | Significantly increases activity | BHET  | pH=7.5 T=30°C | [11] |
| R411A/S416G/S419G | Triple-mutant of previously described variants | Significantly decreases activity | MpNPT | pH=7.5 T=30°C | [11] |
| R411A/S416G/S419G | Triple-mutant of previously described variants | Significantly increases activity | BHET  | pH=7.5 T=30°C | [11] |
| R411A/S416G/S419G | Triple-mutant of previously described variants | Significantly decreases activity | MpNPT | pH=7.5 T=30°C | [11] |
| R411A/S416G/S419G | Triple-mutant of previously described variants | Significantly increases activity | BHET  | pH=7.5 T=30°C | [11] |
| R411A/S416G/S419G | Triple-mutant of previously described variants | Significantly decreases activity | MpNPT | pH=7.5 T=30°C | [11] |

|                             |                                                |                                                                                |      |               |      |
|-----------------------------|------------------------------------------------|--------------------------------------------------------------------------------|------|---------------|------|
| R411A/S416G/S419G           | Triple-mutant of previously described variants | Significantly increases activity                                               | BHET | pH=7.5 T=30°C | [11] |
| S225A                       | Confirm role as catalytic triad residue        | Complete loss of activity                                                      | MHET | pH=8 T=30°C   | [11] |
| S131G                       | Substrate accommodation residue                | K <sub>m</sub> = 184.10 μM ; Significantly higher than WT                      | MHET | pH=8 T=30°C   | [11] |
| E226T                       | Oxyanion hole                                  | Significantly decreases activity                                               | MHET | pH=8 T=30°C   | [11] |
| F495I                       | Active Site Residue                            | Significantly decreases activity; K <sub>cat</sub> = 1.3 ± 0.7 s <sup>-1</sup> | MHET | pH=8 T=30°C   | [11] |
| Lidless MHETase             | Removed Lid domain                             | Very low activity                                                              | MHET | pH=8 T=30°C   | [11] |
| Lidless MHETase C224W/C529S | Removed Lid domain and disulfide bond          | Very low activity                                                              | MHET | pH=8 T=30°C   | [11] |
| Lidless MHETase C224H/C529F | Removed Lid domain and disulfide bond          | Very low activity                                                              | MHET | pH=8 T=30°C   | [11] |
| MHETase with 7 disulfides   | Additional 2 disulfide bonds                   | Very low activity                                                              | MHET | pH=8 T=30°C   | [11] |

**Table S3:** Mutagenesis assays with *Pa*PETase

| Mutation                          | Rationale                    | Assay Results       | Substrate      | Assay Conditions      | REF  |
|-----------------------------------|------------------------------|---------------------|----------------|-----------------------|------|
| G254S                             | Replace with PETase residues | Diminished Activity | <i>p</i> NPB   | pH=7.4 T= 30 °C       | [12] |
| S256N                             | Replace with PETase residues | Diminished Activity | <i>p</i> NPB   | pH=7.4 T= 30 °C       | [12] |
| I257S                             | Replace with PETase residues | Diminished Activity | <i>p</i> NPB   | pH=7.4 T= 30 °C       | [12] |
| Y258N                             | Replace with PETase residues | Diminished Activity | <i>p</i> NPB   | pH=7.4 T= 30 °C       | [12] |
| N259Q                             | Replace with PETase residues | Diminished Activity | <i>p</i> NPB   | pH=7.4 T= 30 °C       | [12] |
| Y250S                             | Replace with PETase residues | Increased Activity  | <i>p</i> NPB   | pH=7.4 T= 30 °C       | [12] |
| G254S, S256N, I257S, Y258N, N259Q | Replace with PETase residues | Diminished Activity | <i>p</i> NPB   | pH=7.4 T= 30 °C       | [12] |
| G254S                             | Replace with PETase residues | Diminished Activity | BHET           | pH=7.4 T= 30 °C, 24 h | [12] |
| S256N                             | Replace with PETase residues | Diminished Activity | BHET           | pH=7.4 T= 30 °C, 24 h | [12] |
| I257S                             | Replace with PETase residues | Diminished Activity | BHET           | pH=7.4 T= 30 °C, 24 h | [12] |
| Y258N                             | Replace with PETase residues | Diminished Activity | BHET           | pH=7.4 T= 30 °C, 24 h | [12] |
| N259Q                             | Replace with PETase residues | Diminished Activity | BHET           | pH=7.4 T= 30 °C, 24 h | [12] |
| Y250S                             | Replace with PETase residues | Increased Activity  | BHET           | pH=7.4 T= 30 °C, 24 h | [12] |
| G254S, S256N, I257S, Y258N, N259Q | Replace with PETase residues | Diminished Activity | BHET           | pH=7.4 T= 30 °C, 24 h | [12] |
| G254S                             | Replace with PETase residues | Diminished Activity | Amorphous PET  | pH=7.4 T= 30 °C, 48 h | [12] |
| S256N                             | Replace with PETase residues | Diminished Activity | Amorphous PET  | pH=7.4 T= 30 °C, 48 h | [12] |
| I257S                             | Replace with PETase residues | Diminished Activity | Amorphous PET  | pH=7.4 T= 30 °C, 48 h | [12] |
| Y258N                             | Replace with PETase residues | Diminished Activity | Amorphous PET  | pH=7.4 T= 30 °C, 48 h | [12] |
| N259Q                             | Replace with PETase residues | Diminished Activity | Amorphous PET  | pH=7.4 T= 30 °C, 48 h | [12] |
| Y250S                             | Replace with PETase residues | Increased Activity  | Amorphous PET  | pH=7.4 T= 30 °C, 48 h | [12] |
| G254S, S256N, I257S, Y258N, N259Q | Replace with PETase residues | Diminished Activity | Amorphous PET  | pH=7.4 T= 30 °C, 48 h | [12] |
| G254S                             | Replace with PETase residues | No activity         | Commercial PET | pH=7.4 T= 30 °C, 48 h | [12] |
| S256N                             | Replace with PETase residues | No activity         | Commercial PET | pH=7.4 T= 30 °C, 48 h | [12] |
| I257S                             | Replace with PETase residues | No activity         | Commercial PET | pH=7.4 T= 30 °C, 48 h | [12] |
| Y258N                             | Replace with PETase residues | No activity         | Commercial PET | pH=7.4 T= 30 °C, 48 h | [12] |

|                                         |                                 |                    |                   |                          |      |
|-----------------------------------------|---------------------------------|--------------------|-------------------|--------------------------|------|
| N259Q                                   | Replace with<br>PETase residues | Increased Activity | Commercial<br>PET | pH=7.4 T= 30 °C, 48<br>h | [12] |
| Y250S                                   | Replace with<br>PETase residues | Increased Activity | Commercial<br>PET | pH=7.4 T= 30 °C, 48<br>h | [12] |
| G254S, S256N,<br>I257S, Y258N,<br>N259Q | Replace with<br>PETase residues | No activity        | Commercial<br>PET | pH=7.4 T= 30 °C, 48<br>h | [12] |

**Table S4:** Mutagenesis assays with LCC

| Mutation                | Rationale                      | Assay Results                                                           | Substrate | Assay Conditions | REF  |
|-------------------------|--------------------------------|-------------------------------------------------------------------------|-----------|------------------|------|
| C275A/C292A             | Disrupting disulfide bridge    | T <sub>m</sub> 15 °C lower than WT                                      | PET film  | pH = 8.0         | [13] |
| F243I                   | Binding site residues          | 27 % increase in activity                                               | PET film  | pH = 8.0         | [14] |
| F243W                   | Binding site residues          | 17 % increase in activity                                               | PET film  | pH = 8.0         | [14] |
| T96M                    | Binding site residues          | Similar activity and higher T <sub>m</sub> than WT                      | PET film  | pH = 8.0         | [14] |
| Y127G                   | Binding site residues          | Similar activity and higher T <sub>m</sub> than WT                      | PET film  | pH = 8.0         | [14] |
| N246D                   | Binding site residues          | Similar activity and higher T <sub>m</sub> than WT                      | PET film  | pH = 8.0         | [14] |
| N246M                   | Binding site residues          | Similar activity and higher T <sub>m</sub> than WT                      | PET film  | pH = 8.0         | [14] |
| D238C/S283C             | Additional disulfide bond      | T <sub>m</sub> increased by 9.8 °C compared with WT; 28 % activity loss | PET film  | pH = 8.0         | [14] |
| F243I/D238C/S283C       | Combination of tested variants | Similar activity and higher T <sub>m</sub> than WT                      | PET film  | pH = 8.0         | [14] |
| F243W/D238C/S283C       | Combination of tested variants | Similar activity and higher T <sub>m</sub> than WT                      | PET film  | pH = 8.0         | [14] |
| F243I/D238C/S283C/Y127G | Combination of tested variants | Similar activity and higher T <sub>m</sub> than WT                      | PET film  | pH = 8.0         | [14] |
| F243I/D238C/S283C/N246M | Combination of tested variants | Similar activity and higher T <sub>m</sub> than WT                      | PET film  | pH = 8.0         | [14] |
| F243W/D238C/S283C/Y127G | Combination of tested variants | Similar activity and higher T <sub>m</sub> than WT                      | PET film  | pH = 8.0         | [14] |
| F243W/D238C/S283C/N246M | Combination of tested variants | Similar activity and higher T <sub>m</sub> than WT                      | PET film  | pH = 8.0         | [14] |

**Table S5:** Mutagenesis assays with *Tf*HCut

| Mutation    | Rationale                            | Assay Results                             | Substrate    | Assay Conditions | REF  |
|-------------|--------------------------------------|-------------------------------------------|--------------|------------------|------|
| I218A       | Active site enlargement              | two-fold activity increase compared to WT | PET fabric   | 60 °C pH 7.5     | [15] |
| Q132A/T101A | Increase active site hydrophobicity  | two-fold activity increase compared to WT | PET fabric   | 60 °C pH 7.5     | [15] |
| Y100A       | Residues near catalytic triad        | Activity increase                         | <i>p</i> NPB | pH 8.0           | [16] |
| T101A       | Residues near catalytic triad        | Activity decrease                         | <i>p</i> NPB | pH 8.0           | [16] |
| H169A       | Residues near catalytic triad        | Activity decrease                         | <i>p</i> NPB | pH 8.0           | [16] |
| M171A       | Residues near catalytic triad        | Activity decrease                         | <i>p</i> NPB | pH 8.0           | [16] |
| T247A       | Residues near catalytic triad        | Activity increase                         | <i>p</i> NPB | pH 8.0           | [16] |
| F249A       | Residues near catalytic triad        | Activity increase                         | <i>p</i> NPB | pH 8.0           | [16] |
| S106A       | Residues near substrate binding site | Activity decrease                         | <i>p</i> NPB | pH 8.0           | [16] |
| L130A       | Residues near substrate binding site | Activity increase                         | <i>p</i> NPB | pH 8.0           | [16] |
| Q132A       | Residues near substrate binding site | Activity decrease                         | <i>p</i> NPB | pH 8.0           | [16] |
| N252A       | Residues near substrate binding site | Activity decrease                         | <i>p</i> NPB | pH 8.0           | [16] |
| I253A       | Residues near substrate binding site | Activity increase                         | <i>p</i> NPB | pH 8.0           | [16] |

**Table S6:** Mutagenesis assays with *Sv*Cut190.

| Mutations                                                         | Rationale                                                 | Assay result                                                                       | Substrate     | Assay condition                            | REF  |
|-------------------------------------------------------------------|-----------------------------------------------------------|------------------------------------------------------------------------------------|---------------|--------------------------------------------|------|
| S226P/R228S/S176                                                  | Substrate recognition mechanism analyses                  | Inactive                                                                           | Et- succinate | -                                          | [17] |
| S226P/R228S/S176                                                  | Substrate recognition mechanism analyses                  | Inactive                                                                           | Et-adipate    | -                                          | [17] |
| S226P/R228S/Q138A/D250C-296C/Q123H/N202H/S176A                    | Metal binding in the inactive form                        | Inactive                                                                           | -             | 70 °C, pH 7.0, 24%glycerol                 | [18] |
| /S226P/R228S/S176A with deletion of the three C-terminal residues | Metal binding in the inactive form                        | Inactive                                                                           | -             | 37 °C, 7.0 pH, 300 mM CaCl <sub>2</sub>    | [19] |
| S226P                                                             | Increased thermostability in other enzyme                 | Increased thermostability by 3.7 °C                                                | -             | 37, °C pH 7.0, [Ca <sup>2+</sup> ] free    | [20] |
| S226P                                                             | Increased thermostability in other enzyme                 | Increased thermostability in presence of Ca <sup>2+</sup> by 4.9 °C                | -             | 37, °C pH 7.0, 300 mM [Ca <sup>2+</sup> ]  | [20] |
| S226P/R228S                                                       | Adding a variant that potentially influences the reaction | K <sub>cat</sub> =7.1 s <sup>-1</sup> ; K <sub>m</sub> = 0.68 mM                   | PNPB          | 37 °C, pH 7.0, 300 mM [Ca <sup>2+</sup> ]  | [20] |
| S226P/R228S                                                       | Adding a variant that potentially influences the reaction | K <sub>cat</sub> =8.0 s <sup>-1</sup> ; K <sub>m</sub> = 0.04 mM                   | PBSA          | 37 °C, pH 7.0, 300 mM [Ca <sup>2+</sup> ]  | [20] |
| S226P/R228S                                                       | Adding a variant that potentially influences the reaction | K <sub>cat</sub> 8.0 s <sup>-1</sup> ; K <sub>m</sub> = 10.8 mM                    | PBSA Unit     | 37, °C pH 7.0, 300 mM [Ca <sup>2+</sup> ]  | [20] |
| S226P/R228S                                                       | Influence activity                                        | Increased thermostability in presence of Ca <sup>2+</sup> by 6.2 °C                | -             | 37, °C pH 7.0, 300 mM [Ca <sup>2+</sup> ]  | [20] |
| S226P/R228S/T262K                                                 | Adding a common residue in homologous cutinases           | Diminishes thermostability when compared to the double mutant                      | -             | 37, °C pH 7.0, 300 mM [Ca <sup>2+</sup> ]  | [20] |
| S226P/R228S/W201A                                                 | Vicinity of the oxyanion hole                             | K <sub>cat</sub> = 2.9 ± 0.07 s <sup>-1</sup> ; K <sub>m</sub> = 0.65 ± 0.01 mM    | PBSA          | 37 °C, pH 8.2 , 2.5 mM [Ca <sup>2+</sup> ] | [21] |
| S226P/R228S/F106A                                                 | Oxyanion hole residue                                     | K <sub>cat</sub> = 0.65 ± 0.03 s <sup>-1</sup> ; K <sub>m</sub> = 0.016 ± 0.001 mM | PBSA          | 37 °C, pH 8.2 , 2.5 mM [Ca <sup>2+</sup> ] | [21] |

|                                                            |                                                        |                                                                 |      |                                            |      |
|------------------------------------------------------------|--------------------------------------------------------|-----------------------------------------------------------------|------|--------------------------------------------|------|
| S226P/R228S/F106Y                                          | Oxyanion hole residue                                  | Kcat= $20 \pm 0.05$ s <sup>-1</sup> ; Km= $0.080 \pm 0.005$ mM  | PBSA | 37 °C, pH 8.2 , 2.5 mM [Ca <sup>2+</sup> ] | [21] |
| S226P/R228S/M177A                                          | Oxyanion hole residue                                  | No activity                                                     | PBSA | 37 °C, pH 8.2 , 2.5 mM [Ca <sup>2+</sup> ] | [21] |
| S226P/R228S/Q138A                                          | Vicinity of the oxyanion hole                          | Kcat= $65 \pm 0.4$ s <sup>-1</sup> ; Km= $0.048 \pm 0.001$ mM   | PBSA | 37 °C, pH 8.2 , 2.5 mM [Ca <sup>2+</sup> ] | [21] |
| S226P/R228S/T107A                                          | Vicinity of the oxyanion hole                          | Kcat= $8.7 \pm 0.05$ s <sup>-1</sup> ; Km= $0.036 \pm 0.001$ mM | PBSA | 37 °C, pH 8.2 , 2.5 mM [Ca <sup>2+</sup> ] | [21] |
| S226P/R228S/Q138D                                          | Vicinity of the oxyanion hole                          | Kcat= $61 \pm 0.3$ s <sup>-1</sup> ; Km= $0.21 \pm 0.001$ mM    | PBSA | 37 °C, pH 8.2 , 2.5 mM [Ca <sup>2+</sup> ] | [21] |
| S226P/R228S/I224A                                          | Active site residue                                    | Kcat= $150 \pm 0.2$ s <sup>-1</sup> ; Km= $0.15 \pm 0.003$ mM   | PBSA | 37 °C, pH 8.2 , 2.5 mM [Ca <sup>2+</sup> ] | [21] |
| S226P/R228S/I224/Q138A                                     | Active site and vicinity of the oxyanion hole residues | Kcat= $150 \pm 0.2$ s <sup>-1</sup> ; Km= $0.24 \pm 0.002$ mM   | PBSA | 37 °C, pH 8.2 , 2.5 mM [Ca <sup>2+</sup> ] | [21] |
| S226P/R228S/H175A                                          | Ca <sup>2+</sup> binding-site residue                  | No activity                                                     | PBSA | 37 °C, pH 8.2 , 2.5 mM [Ca <sup>2+</sup> ] | [21] |
| S226P/R228S/N258A                                          | Ca <sup>2+</sup> binding-site residue                  | Kcat= $26 \pm 0.01$ s <sup>-1</sup> ; Km= $0.065 \pm 0.001$ mM  | PBSA | 37 °C, pH 8.2 , 2.5 mM [Ca <sup>2+</sup> ] | [21] |
| S226P/R228S/S112A                                          | Ca <sup>2+</sup> binding-site residue                  | Kcat= $30 \pm 0.1$ s <sup>-1</sup> ; Km= $0.071 \pm 0.001$ mM   | PBSA | 37 °C, pH 8.2 , 2.5 mM [Ca <sup>2+</sup> ] | [21] |
| S226P/R228S/N258A/I224A                                    | Active site and vicinity of the oxyanion hole residues | Kcat= $30 \pm 0.05$ s <sup>-1</sup> ; Km= $0.15 \pm 0.001$ mM   | PBSA | 37 °C, pH 8.2 , 2.5 mM [Ca <sup>2+</sup> ] | [21] |
| S226P/R228S with deletion of the three C-terminal residues | C-terminal residues deletion                           | Kcat= 100 s <sup>-1</sup> ; Km= 0.282 mM                        | PBSA | 37 °C, pH 7.0 , 300 mM CaCl <sub>2</sub>   | [19] |
| S226P/R228S/Q138A                                          | Vicinity of the oxyanion hole                          | Kcat= 64 s <sup>-1</sup> ; Km= 0.048 mM ; Tm= 55.9 °C           | PBSA | 37 °C, pH 8.2 , [Ca <sup>2+</sup> ] free   | [22] |
| S226P/R228S/Q138A                                          | Vicinity of the oxyanion hole                          | Kcat= 64 s <sup>-1</sup> ; Km= 0.048 mM ; Tm= N/A °C            | PBSA | 37 °C, pH 8.2, 2.5 mM [Ca <sup>2+</sup> ]  | [22] |
| S226P/R228S/78S                                            | Ca <sup>2+</sup> binding-site residue introduction     | Kcat= 151 s <sup>-1</sup> ; Km= 0.12 mM ; Tm= 55.8 °C           | PBSA | 37 °C, pH 8.2 , [Ca <sup>2+</sup> ] free   | [22] |
| S226P/R228S/78S                                            | Ca <sup>2+</sup> binding-site residue introduction     | Kcat= 151 s <sup>-1</sup> ; Km= 0.12 mM ; Tm= 66.7 °C           | PBSA | 37 °C, pH 8.2, 2.5 mM [Ca <sup>2+</sup> ]  | [22] |

|                                          |                                                                                    |                                                             |      |                                 |      |
|------------------------------------------|------------------------------------------------------------------------------------|-------------------------------------------------------------|------|---------------------------------|------|
| S226P/R228S/D250C-296C                   | Disulfide bond introduction                                                        | Kcat= 50 s <sup>-1</sup> ;<br>Km= 0.15 mM ;<br>Tm= 79.0 °C  | PBSA | 37 °C, pH 8.2 , [Ca2+]<br>free  | [22] |
| S226P/R228S/D250C-296C                   | Disulfide bond introduction                                                        | Kcat= 50 s <sup>-1</sup> ;<br>Km= 0.15 mM ;<br>Tm= 78.9 °C  | PBSA | 37 °C, pH 8.2, 2.5 mM<br>[Ca2+] | [22] |
| S226P/R228S/Q138A/D250C-296C             | Ca2+ binding-site residue and disulfide bond introduction                          | Kcat= 150 s <sup>-1</sup> ;<br>Km= 0.39 mM ;<br>Tm= 79.2 °C | PBSA | 37 °C, pH 8.2 , [Ca2+]<br>free  | [22] |
| S226P/R228S/Q138A/D250C-296C             | Ca2+ binding-site residue and disulfide bond introduction                          | Kcat= 150 s <sup>-1</sup> ;<br>Km= 0.39 mM ;<br>Tm= 77.9 °C | PBSA | 37 °C, pH 8.2, 2.5 mM<br>[Ca2+] | [22] |
| S226P/R228S/Q138A/D250C-296C/E220R       | Ca2+ binding-site residue and disulfide bond introduction                          | Kcat= 150 s <sup>-1</sup> ;<br>Km= 0.48 mM ;<br>Tm= 78.3 °C | PBSA | 37 °C, pH 8.2 , [Ca2+]<br>free  | [22] |
| S226P/R228S/Q138A/D250C-296C/E220R       | Ca2+ binding-site residue and disulfide bond introduction                          | Kcat= 150 s <sup>-1</sup> ;<br>Km= 0.48 mM ;<br>Tm= 72.3 °C | PBSA | 37 °C, pH 8.2, 2.5 mM<br>[Ca2+] | [22] |
| S226P/R228S/Q138A/D250C-296C/E220R-G251D | Ca2+ binding-site residue and disulfide bond introduction                          | Kcat= 75 s <sup>-1</sup> ;<br>Km= 0.18 mM ;<br>Tm= 75.8 °C  | PBSA | 37 °C, pH 8.2 , [Ca2+]<br>free  | [22] |
| S226P/R228S/Q138A/D250C-296C/E220R-G251D | Ca2+ binding-site residue and disulfide bond introduction                          | Kcat= 75 s <sup>-1</sup> ;<br>Km= 0.18 mM ;<br>Tm= 75.3 °C  | PBSA | 37 °C, pH 8.2, 2.5 mM<br>[Ca2+] | [22] |
| S226P/R228S/Q138A/D250C-296C/Q123H/N202H | Ca2+ binding-site residue and disulfide bond introduction and surface modification | Kcat= 100 s <sup>-1</sup> ;<br>Km= 0.32 mM ;<br>Tm= 85.7 °C | PBSA | 37 °C, pH 8.2 , [Ca2+]<br>free  | [22] |
| S226P/R228S/Q138A/D250C-296C/Q123H/N202H | Ca2+ binding-site residue and disulfide bond introduction and surface modification | Kcat= 100 s <sup>-1</sup> ;<br>Km= 0.32 mM ;<br>Tm= 82.6 °C | PBSA | 37 °C, pH 8.2, 2.5 mM<br>[Ca2+] | [22] |
| S226P/R228S/E184R                        | Ca2+ binding-site residue                                                          | Kcat= 60 s <sup>-1</sup> ;<br>Km= 0.17 mM ;<br>Tm= 53.9 °C  | PBSA | 37 °C, pH 8.2 , [Ca2+]<br>free  | [22] |
| S226P/R228S/E184R                        | Surface modification                                                               | Kcat= 60 s <sup>-1</sup> ;<br>Km= 0.17 mM ;<br>Tm= 64.1 °C  | PBSA | 37 °C, pH 8.2, 2.5 mM<br>[Ca2+] | [22] |
| S226P/R228S/Q110E                        | Surface modification                                                               | Kcat= 27 s <sup>-1</sup> ;<br>Km= 0.070 mM ;<br>Tm= 59. °C  | PBSA | 37 °C, pH 8.2 , [Ca2+]<br>free  | [22] |
| S226P/R228S/N133D                        | Surface modification                                                               | Kcat= 25 s <sup>-1</sup> ;<br>Km= 0.079 mM ;<br>Tm= 60.4 °C | PBSA | 37 °C, pH 8.2 , [Ca2+]<br>free  | [22] |
| S226P/R228S/Q141E                        | Surface modification                                                               | Kcat= 50 s <sup>-1</sup> ;<br>Km= 0.11 mM ;<br>Tm= 60.7 °C  | PBSA | 37 °C, pH 8.2 , [Ca2+]<br>free  | [22] |

|                               |                                                                       |                                                                                                    |                |                                                                                                              |      |
|-------------------------------|-----------------------------------------------------------------------|----------------------------------------------------------------------------------------------------|----------------|--------------------------------------------------------------------------------------------------------------|------|
| S226P/R228S/Q138A/Q141E       | Ca <sup>2+</sup> binding-site residue and surface modification        | K <sub>cat</sub> = 19 s <sup>-1</sup> ;<br>K <sub>m</sub> = 0.045 mM ;<br>T <sub>m</sub> = 57.9 °C | PBSA           | 37 °C, pH 8.2 , [Ca <sup>2+</sup> ]<br>free                                                                  | [22] |
| S226P/R228S/N168D             | Surface modification                                                  | K <sub>cat</sub> = 30 s <sup>-1</sup> ;<br>K <sub>m</sub> = 0.091 mM ;<br>T <sub>m</sub> = 56.0 °C | PBSA           | 37 °C, pH 8.2 , [Ca <sup>2+</sup> ]<br>free                                                                  | [22] |
| S226P/R228S/N168A             | Surface modification                                                  | K <sub>cat</sub> = 43 s <sup>-1</sup> ;<br>K <sub>m</sub> = 0.10 mM ;<br>T <sub>m</sub> = 56.0 °C  | PBSA           | 37 °C, pH 8.2 , [Ca <sup>2+</sup> ]<br>free                                                                  | [22] |
| S226P/R228S/Q209E             | Surface modification                                                  | K <sub>cat</sub> = 75 s <sup>-1</sup> ;<br>K <sub>m</sub> = 0.20 mM ;<br>T <sub>m</sub> = 58.6 °C  | PBSA           | 37 °C, pH 8.2 , [Ca <sup>2+</sup> ]<br>free                                                                  | [22] |
| S226P/R228S/Q123H             | Surface modification                                                  | K <sub>cat</sub> = 61 s <sup>-1</sup> ;<br>K <sub>m</sub> = 0.14 mM ;<br>T <sub>m</sub> = 58.6 °C  | PBSA           | 37 °C, pH 8.2 , [Ca <sup>2+</sup> ]<br>free                                                                  | [22] |
| S226P/R228S/N202H             | Surface modification                                                  | K <sub>cat</sub> = 60 s <sup>-1</sup> ;<br>K <sub>m</sub> = 0.16 mM ;<br>T <sub>m</sub> = 62.4 °C  | PBSA           | 37 °C, pH 8.2 , [Ca <sup>2+</sup> ]<br>free                                                                  | [22] |
| S226P/R228S                   | Previously studied double mutant                                      | Degrade rate=<br>80.2 ± 4.55 ;<br>Amount of<br>total products=<br>12.5 ± 0.72 mM                   | Microfiber PET | 65 °C, pH 8.5, 2.5 µmol<br>CaCl <sub>2</sub> , 24% glycerol, 2<br>nmol enzyme and 2 mg<br>microfiber PET     | [22] |
| S226P/R228S/Q138A             | Vicinity of the oxyanion hole                                         | Degrade rate=<br>104 ± 7.00 ;<br>Amount of<br>total products=<br>16.2 ± 1.1 mM                     | Microfiber PET | 65 °C, pH 8.5 , 2.5 µmol<br>CaCl <sub>2</sub> , 24% glycerol, 2<br>nmol enzyme and 2 mg<br>microfiber PET    | [22] |
| S226P/R228S/I224A             | Active site residue                                                   | Degrade rate=<br>44.9 ± 5.60 ;<br>Amount of<br>total products=<br>6.96 ± 0.87 mM                   | Microfiber PET | 65 °C, pH 8.5 , 2.5<br>µmol CaCl <sub>2</sub> , 24%<br>glycerol, 2 nmol<br>enzyme and 2 mg<br>microfiber PET | [22] |
| S226P/R228S                   | Previously studied double mutant                                      | Degradation<br>rate products=<br>4.53 ± 0.29<br>µmol/cm <sup>2</sup>                               | APEXA 4027TM   | 50 °C, pH 8.2-8.5, 2.5<br>µmol CaCl <sub>2</sub> , 24%<br>glycerol, 2 µM Cut190<br>S226P/R228S               | [22] |
| S226P/R228S                   | Previously studied double mutant                                      | Degradation<br>rate products=<br>46.9 ± 1.6<br>µmol/cm <sup>2</sup>                                | PET-S          | 60 °C, pH 8.2-8.5, 2.5<br>µmol CaCl <sub>2</sub> , 24%<br>glycerol, 2 µM Cut190<br>S226P/R228S               | [22] |
| S226P/R228S                   | Previously studied double mutant                                      | Degradation<br>rate products=<br>12.3 ± 1.2<br>µmol/cm <sup>2</sup>                                | PET-GF         | 65 °C, pH 8.2-8.5, 2.5<br>µmol CaCl <sub>2</sub> , 24%<br>glycerol, 2 µM Cut190<br>S226P/R228S               | [22] |
| S226P/R228S/Q138A/D250C-E296C | Ca <sup>2+</sup> binding-site residue and disulfide bond introduction | Degradation<br>rate products=<br>19.2 ± 1.9<br>µmol/cm <sup>2</sup>                                | PET-GF         | 70 °C, pH 8.2-8.5, 2.5<br>µmol CaCl <sub>2</sub> , 24%<br>glycerol, 2 µM Cut190<br>S226P/R228S               | [22] |

|                                                        |                                                                                              |                                                                                                |        |                                                                                       |      |
|--------------------------------------------------------|----------------------------------------------------------------------------------------------|------------------------------------------------------------------------------------------------|--------|---------------------------------------------------------------------------------------|------|
| S226P/R228S/Q138A/D250C-E296C/E-220R-G251D             | Ca <sup>2+</sup> binding-site reuse and disulfide bond introduction                          | Degradation rate products = 11.8 ± 1.8 μmol/cm <sup>2</sup>                                    | PET-GF | 70 °C, pH 8.2-8.5, 2.5 μmol CaCl <sub>2</sub> , 24% glycerol, 2 μM Cut190 S226P/R228S | [22] |
| S226P/R228S/Q138A/D250C-E296C/E-220R-G251D/Q123H/N202H | Ca <sup>2+</sup> binding-site reuse and disulfide bond introduction and surface modification | Degradation rate products = 13.9 ± 2.3 μmol/cm <sup>2</sup>                                    | PET-GF | 70 °C, pH 8.2-8.5, 2.5 μmol CaCl <sub>2</sub> , 24% glycerol, 2 μM Cut190 S226P/R228S | [22] |
| S226P/R228S/Q138A/D250C-E296C//Q123H/N202H             | Ca <sup>2+</sup> binding-site reuse and disulfide bond introduction and surface modification | Degradation rate products = 28.6 ± 2.3 μmol/cm <sup>2</sup>                                    | PET-GF | 70 °C, pH 8.2-8.5, 2.5 μmol CaCl <sub>2</sub> , 24% glycerol, 2 μM Cut190 S226P/R228S | [22] |
| S226P/R228S/Q138A/D250C-296C/Q123H/N202H               | Ca <sup>2+</sup> binding-site reuse, disulfide bond introduction and surface modification    | T <sub>m</sub> = 82.1 °C                                                                       | PBSA   | 37 °C, pH 8.2, [Ca <sup>2+</sup> ] free                                               | [18] |
| S226P/R228S/Q138A/D250C-296C/Q123H/N202H               | Ca <sup>2+</sup> binding-site reuse, disulfide bond introduction and surface modification    | K <sub>cat</sub> = 26.7 s <sup>-1</sup> ; K <sub>m</sub> = 0.079 mM ; T <sub>m</sub> = 83.3 °C | PBSA   | 37 °C, pH 8.2 , 2.5 mM [Ca <sup>2+</sup> ]                                            | [18] |
| S226P/R228S/Q138A/D250C-296C/Q123H/N202H               | Ca <sup>2+</sup> binding-site reuse, disulfide bond introduction and surface modification    | K <sub>cat</sub> = 39.2 s <sup>-1</sup> ; K <sub>m</sub> = 0.171 mM ; T <sub>m</sub> = 84.8 °C | PBSA   | 37 °C, pH 8.2, 25 mM [Ca <sup>2+</sup> ]                                              | [18] |

**Table S7:** Mutagenesis assays with *TcCut2*

| Mutations      | Rationale                                                            | Assay result                                 | Substrate | Assay condition | REF  |
|----------------|----------------------------------------------------------------------|----------------------------------------------|-----------|-----------------|------|
| S131A          | Catalytic triad residue substitution                                 | Inactive                                     | PBA       | 20 °C , pH 7.0  | [23] |
| R19S           | Substitution by the residue located in the same position in Thc_Cut1 | Kcat= 36 s <sup>-1</sup> ; Km= 1.2 ± 0.1 mM  | pNPA      | 25 °C , pH 7.0  | [24] |
| R19S           | Substitution by the residue located in the same position in Thc_Cut1 | Kcat= 80 s <sup>-1</sup> ; Km= 2.2 ± 0.4 mM  | pNPB      | 25 °C , pH 7.0  | [24] |
| R29D           | Substitution by the residue located in the same position in Thc_Cut1 | Kcat= 207 s <sup>-1</sup> ; Km= 1.3 ± 0.4 mM | pNPA      | 25 °C , pH 7.0  | [24] |
| R29D           | Substitution by the residue located in the same position in Thc_Cut1 | Kcat= 191 s <sup>-1</sup> ; Km= 2.0 ± 0.4 mM | pNPB      | 25 °C , pH 7.0  | [24] |
| A30V           | Substitution by the residue located in the same position in Thc_Cut1 | Kcat= 260 s <sup>-1</sup> ; Km= 1.7 ± 0.2 mM | pNPA      | 25 °C , pH 7.0  | [24] |
| A30V           | Substitution by the residue located in the same position in Thc_Cut1 | Kcat= 183 s <sup>-1</sup> ; Km= 1.1 ± 0.3 mM | pNPB      | 25 °C , pH 7.0  | [24] |
| Q65E           | Substitution by the residue located in the same position in Thc_Cut1 | Kcat= 7 s <sup>-1</sup> ; Km= 1.5 ± 0.2 mM   | pNPA      | 25 °C , pH 7.0  | [24] |
| Q65E           | Substitution by the residue located in the same position in Thc_Cut1 | Kcat= 15 s <sup>-1</sup> ; Km= 2.6 ± 0.8 mM  | pNPB      | 25 °C , pH 7.0  | [24] |
| L83A           | Substitution by the residue located in the same position in Thc_Cut1 | Kcat= 25 s <sup>-1</sup> ; Km= 1.9 ± 0.1 mM  | pNPA      | 25 °C , pH 7.0  | [24] |
| L83A           | Substitution by the residue located in the same position in Thc_Cut1 | Kcat= 32 s <sup>-1</sup> ; Km= 2.1 ± 0.6 mM  | pNPB      | 25 °C , pH 7.0  | [24] |
| R187K          | Substitution by the residue located in the same position in Thc_Cut1 | Kcat= 35 s <sup>-1</sup> ; Km= 0.8 ± 0.1 mM  | pNPA      | 25 °C , pH 7.0  | [24] |
| R187K          | Substitution by the residue located in the same position in Thc_Cut1 | Kcat= 79 s <sup>-1</sup> ; Km= 4.0 ± 0.5 mM  | pNPB      | 25 °C , pH 7.0  | [24] |
| R29D/A30V      | Improve previously discovered variant                                | Kcat= 100 s <sup>-1</sup> ; Km= 1.3 ± 0.3 mM | pNPA      | 25 °C , pH 7.0  | [24] |
| R29D/A30V      | Improve previously discovered variant                                | Kcat= 173 s <sup>-1</sup> ; Km= 1.0 ± 0.3 mM | pNPB      | 25 °C , pH 7.0  | [24] |
| R19S/R29D/A30V | Lower activity than the double mutant                                | Kcat= 76 s <sup>-1</sup> ; Km= 1.2 ± 0.1 mM  | pNPA      | 25 °C , pH 7.0  | [24] |
| R19S/R29D/A30V | Lower activity than the double mutant                                | Kcat= 136 s <sup>-1</sup> ; Km= 1.4 ± 0.4 mM | pNPB      | 25 °C , pH 7.0  | [24] |

**Table S8:** Mutagenesis assays with *TaEst1*.

| Mutations        | Rationale                  | Assay result                                | Substrate | Assay condition | REF  |
|------------------|----------------------------|---------------------------------------------|-----------|-----------------|------|
| A68V/T253P       | Increase thermal stability | Activity and Tm increase                    | 3PET      | pH 7.0 50 °C    | [25] |
| A68V             | Increase thermal stability | Activity increase                           | 3PET      | pH 7.0 50 °C    | [25] |
| A68V/M259K       | Increase thermal stability | Similar activity to A68V/T253P but lower Tm | 3PET      | pH 7.0 50 °C    | [25] |
| A68V/T253P/M259K | Increase thermal stability | Similar activity to A68V/T253P but lower Tm | 3PET      | pH 7.0 50 °C    | [25] |

**Table S9:** Mutagenesis assays with *TLip*

| Mutations   | Rationale                           | Assay result                                                                               | Substrate     | Assay condition                           | REF  |
|-------------|-------------------------------------|--------------------------------------------------------------------------------------------|---------------|-------------------------------------------|------|
| E109A       | Important residue for stabilization | Significantly lower activity                                                               | Tributyryn    | 25 °C, pH 7.5                             | [26] |
| E109A       | Important residue for stabilization | Significantly lower activity                                                               | Trioctanoin   | 25 °C, pH 7.5                             | [26] |
| W111L       | Important residue for acylation     | Significantly lower activity                                                               | Tributyryn    | 25 °C, pH 7.5                             | [26] |
| W111L       | Important residue for acylation     | Significantly lower activity                                                               | Trioctanoin   | 25 °C, pH 7.5                             | [26] |
| W111F       | Important residue for acylation     | Significantly lower activity                                                               | Tributyryn    | 25 °C, pH 7.5                             | [26] |
| W111F       | Important residue for acylation     | Significantly lower activity                                                               | Trioctanoin   | 25 °C, pH 7.5                             | [26] |
| W111E       | Important residue for acylation     | Significantly lower activity                                                               | Tributyryn    | 25 °C, pH 7.5                             | [26] |
| W111E       | Important residue for acylation     | Significantly lower activity                                                               | Trioctanoin   | 25 °C, pH 7.5                             | [26] |
| W111G       | Important residue for acylation     | Significantly lower activity                                                               | Tributyryn    | 25 °C, pH 7.5                             | [26] |
| W111G       | Important residue for acylation     | Significantly lower activity                                                               | Trioctanoin   | 25 °C, pH 7.5                             | [26] |
| I108C/I277C | Introducing disulfind bond          | Significantly lower specific activity in the absence of TCEP but higher with 5 mM of TCEP  | p-NPB         | 27 °C, pH 7.5, 10 mM [Ca2+], 0-5 mM TCEP  | [27] |
| I108C/I277C | Introducing disulfind bond          | Significantly lower specific activity in the absence of TCEP but higher with 10 mM of TCEP | p-NPDecanoate | 27 °C, pH 7.5, 10 mM [Ca2+], 0-10 mM TCEP | [27] |

**Table S10:** Mutagenesis assays with *TfCa*

| Mutations         | Rationale                                 | Assay result                 | Substrate | Assay condition            | REF  |
|-------------------|-------------------------------------------|------------------------------|-----------|----------------------------|------|
| E184Q             | Important residue for enzymatic activity  | Signifincatly lower activity | p-NPB     | pH 7.5, 10 $\mu$ L ethanol | [28] |
| E319D             | Important residue for enzymatic activity  | Signifincatly lower activity | p-NPB     | pH 7.5, 10 $\mu$ L ethanol | [28] |
| E184Q/E319D       | Important residues for enzymatic activity | Signifincatly lower activity | p-NPB     | pH 7.5, 10 $\mu$ L ethanol | [28] |
| E184H/A186M       | Important residues for enzymatic activity | Signifincatly lower activity | p-NPB     | pH 7.5, 10 $\mu$ L ethanol | [28] |
| E184H/A186M/E319D | Important residues for enzymatic activity | Signifincatly lower activity | p-NPB     | pH 7.5, 10 $\mu$ L ethanol | [28] |

- [1] Han, X.; Liu, W.; Huang, J.-W.; Ma, J.; Zheng, Y.; Ko, T.-P.; Xu, L.; Cheng, Y.-S.; Chen, C.-C.; Guo, R.-T. Structural Insight into Catalytic Mechanism of PET Hydrolase. *Nat. Commun.*, **2017**, *8*, 2106.
- [2] Joo, S.; Cho, I.J.; Seo, H.; Son, H.F.; Sagong, H.-Y.; Shin, T.J.; Choi, S.Y.; Lee, S.Y.; Kim, K.-J. Structural Insight into Molecular Mechanism of Poly(Ethylene Terephthalate) Degradation. *Nat. Commun.*, **2018**, *9*, 382.
- [3] Austin, H.P.; Allen, M.D.; Donohoe, B.S.; Rorrer, N.A.; Kearns, F.L.; Silveira, R.L.; Pollard, B.C.; Dominick, G.; Duman, R.; El Omari, K.; Mykhaylyk, V.; Wagner, A.; Michener, W.E.; Amore, A.; Skaf, M.S.; Crowley, M.F.; Thorne, A.W.; Johnson, C.W.; Woodcock, H.L.; McGeehan, J.E.; Beckham, G.T. Characterization and Engineering of a Plastic-Degrading Aromatic Polyesterase. *Proc. Natl. Acad. Sci. U. S. A.*, **2018**, *115*, E4350–E4357.
- [4] Liu, B.; He, L.; Wang, L.; Li, T.; Li, C.; Liu, H.; Luo, Y.; Bao, R. Protein Crystallography and Site-Direct Mutagenesis Analysis of the Poly(Ethylene Terephthalate) Hydrolase PETase from *Ideonella Sakaiensis*. *Chembiochem*, **2018**, *19*, 1471–1475.
- [5] Liu, C.; Shi, C.; Zhu, S.; Wei, R.; Yin, C.-C. Structural and Functional Characterization of Polyethylene Terephthalate Hydrolase from *Ideonella Sakaiensis*. *Biochem. Biophys. Res. Commun.*, **2019**, *508*, 289–294.
- [6] Son, H.F.; Cho, I.J.; Joo, S.; Seo, H.; Sagong, H.-Y.; Choi, S.Y.; Lee, S.Y.; Kim, K.-J. Rational Protein Engineering of Thermo-Stable PETase from *Ideonella Sakaiensis* for Highly Efficient PET Degradation. *ACS Catal.*, **2019**, *9*, 3519–3526.
- [7] Cui, Y.; Chen, Y.; Liu, X.; Dong, S.; Tian, Y.; Qiao, Y.; Mitra, R.; Han, J.; Li, C.; Han, X.; Liu, W.; Chen, Q.; Du, W.; Tang, S.; Xiang, H.; Liu, H.; Wu, B. Computational Redesign of a PETase for Plastic Biodegradation by the GRAPE Strategy. *bioRxiv*, **2019**.
- [8] Son, H.F.; Joo, S.; Seo, H.; Sagong, H.-Y.; Lee, S.H.; Hong, H.; Kim, K.J. Structural Bioinformatics-Based Protein Engineering of Thermo-Stable PETase from *Ideonella Sakaiensis*. *Enzyme Microb. Technol.*, **2020**, *141*, 109656.
- [9] Ma, Y.; Yao, M.; Li, B.; Ding, M.; He, B.; Chen, S.; Zhou, X.; Yuan, Y. Enhanced Poly(Ethylene Terephthalate) Hydrolase Activity by Protein Engineering. *Engineering*, **2018**, *4*, 888–893.
- [10] Sagong, H.-Y.; Seo, H.; Kim, T.; Son, H.F.; Joo, S.; Lee, S.H.; Kim, S.; Woo, J.-S.; Hwang, S.Y.; Kim, K.-J. Decomposition of the PET Film by MHETase Using Exo-PETase Function. *ACS Catal.*, **2020**, *10*, 4805–4812.
- [11] Palm, G.J.; Reisky, L.; Böttcher, D.; Müller, H.; Michels, E.A.P.; Walczak, M.C.; Berndt, L.; Weiss, M.S.; Bornscheuer, U.T.; Weber, G. Structure of the Plastic-Degrading *Ideonella Sakaiensis* MHETase Bound to a Substrate. *Nat. Commun.*, **2019**, *10*, 1717.
- [12] Bollinger, A.; Thies, S.; Knieps-Grünhagen, E.; Gertzen, C.; Kobus, S.; Höppner, A.; Ferrer, M.; Gohlke, H.; Smits, S.H.J.; Jaeger, K.E. A Novel Polyester Hydrolase From the Marine Bacterium *Pseudomonas Aestusnigri* – Structural and Functional Insights. *Front. Microbiol.*, **2020**, *11*, 1–16.
- [13] Sulaiman, S.; You, D.-J.; Kanaya, E.; Koga, Y.; Kanaya, S. Crystal Structure and Thermodynamic and Kinetic Stability of Metagenome-Derived LC-Cutinase. *Biochemistry*, **2014**, *53*, 1858–1869.
- [14] Tournier, V.; Topham, C.M.; Gilles, A.; David, B.; Folgoas, C.; Moya-Leclair, E.; Kamionka, E.; Desrousseaux, M.-L.; Texier, H.; Gavalda, S.; Cot, M.; Guémard, E.; Dalibey, M.; Nomme, J.;

- Cioci, G.; Barbe, S.; Chateau, M.; André, I.; Duquesne, S.; Marty, A. An Engineered PET Depolymerase to Break down and Recycle Plastic Bottles. *Nature*, **2020**, *580*, 216–219.
- [15] Silva, C.; Da, S.; Silva, N.; Matamá, T.; Araújo, R.; Martins, M.; Chen, S.; Chen, J.; Wu, J.; Casal, M.; Cavaco-Paulo, A. Engineered *Thermobifida Fusca* Cutinase with Increased Activity on Polyester Substrates. *Biotechnol. J.*, **2011**, *6*, 1230–1239.
- [16] Dong, Q.; Yuan, S.; Wu, L.; Su, L.; Zhao, Q.; Wu, J.; Huang, W.; Zhou, J. Structure-Guided Engineering of a *Thermobifida Fusca* Cutinase for Enhanced Hydrolysis on Natural Polyester Substrate. *Bioresour. Bioprocess.*, **2020**, *7*, 37.
- [17] Numoto, N.; Kamiya, N.; Bekker, G.-J.; Yamagami, Y.; Inaba, S.; Ishii, K.; Uchiyama, S.; Kawai, F.; Ito, N.; Oda, M. Structural Dynamics of the PET-Degrading Cutinase-like Enzyme from *Saccharomonospora Viridis* AHK190 in Substrate-Bound States Elucidates the Ca<sup>2+</sup>-Driven Catalytic Cycle. *Biochemistry*, **2018**, *57*, 5289–5300.
- [18] Emori, M.; Numoto, N.; Senga, A.; Bekker, G.-J.; Kamiya, N.; Kobayashi, Y.; Ito, N.; Kawai, F.; Oda, M. Structural Basis of Mutants of PET-Degrading Enzyme from *Saccharomonospora Viridis* AHK190 with High Activity and Thermal Stability. *Proteins Struct. Funct. Bioinforma.*, **2021**, *89*, 502–511.
- [19] Senga, A.; Numoto, N.; Yamashita, M.; Iida, A.; Ito, N.; Kawai, F.; Oda, M. Multiple Structural States of Ca<sup>2+</sup>-Regulated PET Hydrolase, Cut190, and Its Correlation with Activity and Stability. *J. Biochem.*, **2021**, *169*, 207–213.
- [20] Kawai, F.; Oda, M.; Tamashiro, T.; Waku, T.; Tanaka, N.; Yamamoto, M.; Mizushima, H.; Miyakawa, T.; Tanokura, M. A Novel Ca<sup>2+</sup>-Activated, Thermostabilized Polyesterase Capable of Hydrolyzing Polyethylene Terephthalate from *Saccharomonospora Viridis* AHK190. *Appl. Microbiol. Biotechnol.*, **2014**, *98*, 10053–10064.
- [21] Kawabata, T.; Oda, M.; Kawai, F. Mutational Analysis of Cutinase-like Enzyme, Cut190, Based on the 3D Docking Structure with Model Compounds of Polyethylene Terephthalate. *J. Biosci. Bioeng.*, **2017**, *124*, 28–35.
- [22] Oda, M.; Yamagami, Y.; Inaba, S.; Oida, T.; Yamamoto, M.; Kitajima, S.; Kawai, F. Enzymatic Hydrolysis of PET: Functional Roles of Three Ca<sup>2+</sup> Ions Bound to a Cutinase-like Enzyme, Cut190\*, and Its Engineering for Improved Activity. *Appl. Microbiol. Biotechnol.*, **2018**, *102*, 10067–10077.
- [23] Perz, V.; Zumstein, M.T.; Sander, M.; Zitzenbacher, S.; Ribitsch, D.; Guebitz, G.M. Biomimetic Approach to Enhance Enzymatic Hydrolysis of the Synthetic Polyester Poly(1,4-Butylene Adipate): Fusing Binding Modules to Esterases. *Biomacromolecules*, **2015**, *16*, 3889–3896.
- [24] Herrero Acero, E.; Ribitsch, D.; Dellacher, A.; Zitzenbacher, S.; Marold, A.; Steinkellner, G.; Gruber, K.; Schwab, H.; Guebitz, G.M. Surface Engineering of a Cutinase from *Thermobifida Cellulosilytica* for Improved Polyester Hydrolysis. *Biotechnol. Bioeng.*, **2013**, *110*, 2581–2590.
- [25] Thumarat, U.; Kawabata, T.; Nakajima, M.; Nakajima, H.; Sugiyama, A.; Yazaki, K.; Tada, T.; Waku, T.; Tanaka, N.; Kawai, F. Comparison of Genetic Structures and Biochemical Properties of Tandem Cutinase-Type Polyesterases from *Thermobifida Alba* AHK119. *J. Biosci. Bioeng.*, **2015**, *120*, 491–497.
- [26] Martinelle, M.; Holmquist, M.; Clausen, I.G.; Patkar, S.; Svendsen, A.; Hult, K. The Role of Glu87 and Trp89 in the Lid of *Humicola Lanuginosa* Lipase. *Protein Eng. Des. Sel.*, **1996**, *9*, 519–524.

- [27] Skjold-Jørgensen, J.; Vind, J.; Moroz, O. V; Blagova, E.; Bhatia, V.K.; Svendsen, A.; Wilson, K.S.; Bjerrum, M.J. Controlled Lid-Opening in *Thermomyces Lanuginosus* Lipase- An Engineered Switch for Studying Lipase Function. *Biochim. Biophys. acta. Proteins proteomics*, **2017**, 1865, 20–27.
- [28] Billig, S.; Oeser, T.; Birkemeyer, C.; Zimmermann, W. Hydrolysis of Cyclic Poly(Ethylene Terephthalate) Trimers by a Carboxylesterase from *Thermobifida Fusca* KW3. *Appl. Microbiol. Biotechnol.*, **2010**, 87, 1753–1764.
